# Supplementary material for: Assessment of the long-term impacts of PM10and PM2.5particles from construction works on surrounding areas
Source: Royal Society of Chemistry journal article supplement (doi:10.1039/c5em00549c), 2015-12-08
Supplement: c5em00549c1.pdf [file c5em00549c1.pdf]

## Supporting Information (SI)

For

### Assessment of Long-term Impacts of PM<sub>10</sub> and PM<sub>2.5</sub> Particles from Construction Works on Surrounding Areas

*Farhad Azarmi<sup>a</sup>, Prashant Kumar<sup>a, b, \*</sup>, Daniel Marsh<sup>c</sup>, Gary Fulle<sup>c</sup>*

<sup>a</sup>Department of Civil and Environmental Engineering, Faculty of Engineering and Physical Sciences (FEPS), University of Surrey, Guildford GU2 7XH, United Kingdom

<sup>b</sup>Environmental Flow (EnFlo) Research Centre, FEPS, University of Surrey, Guildford GU2 7XH, United Kingdom

<sup>c</sup> MRC HPA Centre for Environment and Health, King's College London, London SE1 9NH, United Kingdom

\*Corresponding author: Department of Civil and Environmental Engineering, Faculty of Engineering and Physical Sciences, University of Surrey, Guildford GU2 7XH, United Kingdom; Tel.: +44 1483 682762; Fax: +44 1483 682135; E-mail addresses:

P.Kumar@surrey.ac.uk, Prashant.Kumar@cantab.net

#### **This PDF file includes:**

Supplementary text sections S1 to S2

Figures S1 to S5

Tables S1 to S4

## **S1. Particle mass concentrations**

Figures S1 and S2 show the average PM<sub>10</sub> and PM<sub>2.5</sub> during the activity and non-activity periods at the CS<sub>1</sub>, CS<sub>2</sub> and CS<sub>3</sub>, respectively (Tables S1- S4).

## **S2. Variation of PM<sub>10</sub> and PM<sub>2.5</sub> during different years**

In order to understand the variability in concentrations during individual years, we plotted Figures S3 and S4 that present the annual mean PM<sub>10</sub> concentrations obtained from monitoring stations (MS<sub>1</sub> to MS<sub>9</sub>) around the CS<sub>1</sub>. These annual mean concentrations of PM<sub>10</sub> and PM<sub>2.5</sub> ranged from 10 to 80 µg m<sup>-3</sup> (Figure S3) and 5 to 55 µg m<sup>-3</sup> (Figure S4), respectively.

Figure S3 also shows PM<sub>10</sub> values at 6 monitoring stations during 5 years (2009-2013) of measurements around the CS<sub>2</sub>. The annual mean PM<sub>10</sub> concentrations obtained from monitoring stations (MS<sub>10</sub> to MS<sub>15</sub>) around the CS<sub>2</sub> ranged from 5 to 62 µg m<sup>-3</sup>. Moreover Figure S3 shows PM<sub>10</sub> values during 2011 and 2012 at MS<sub>16</sub> and MS<sub>17</sub> around the CS<sub>3</sub>. The annual mean PM<sub>10</sub> concentrations were found to be in the 6 to 90 µg m<sup>-3</sup> range with the mean of 28.90 and 32.99 µg m<sup>-3</sup> at MS<sub>16</sub> and MS<sub>17</sub>, respectively. Moreover, Figure S5 presents a total number of exceedences over the EU limit value at the individual monitoring stations.

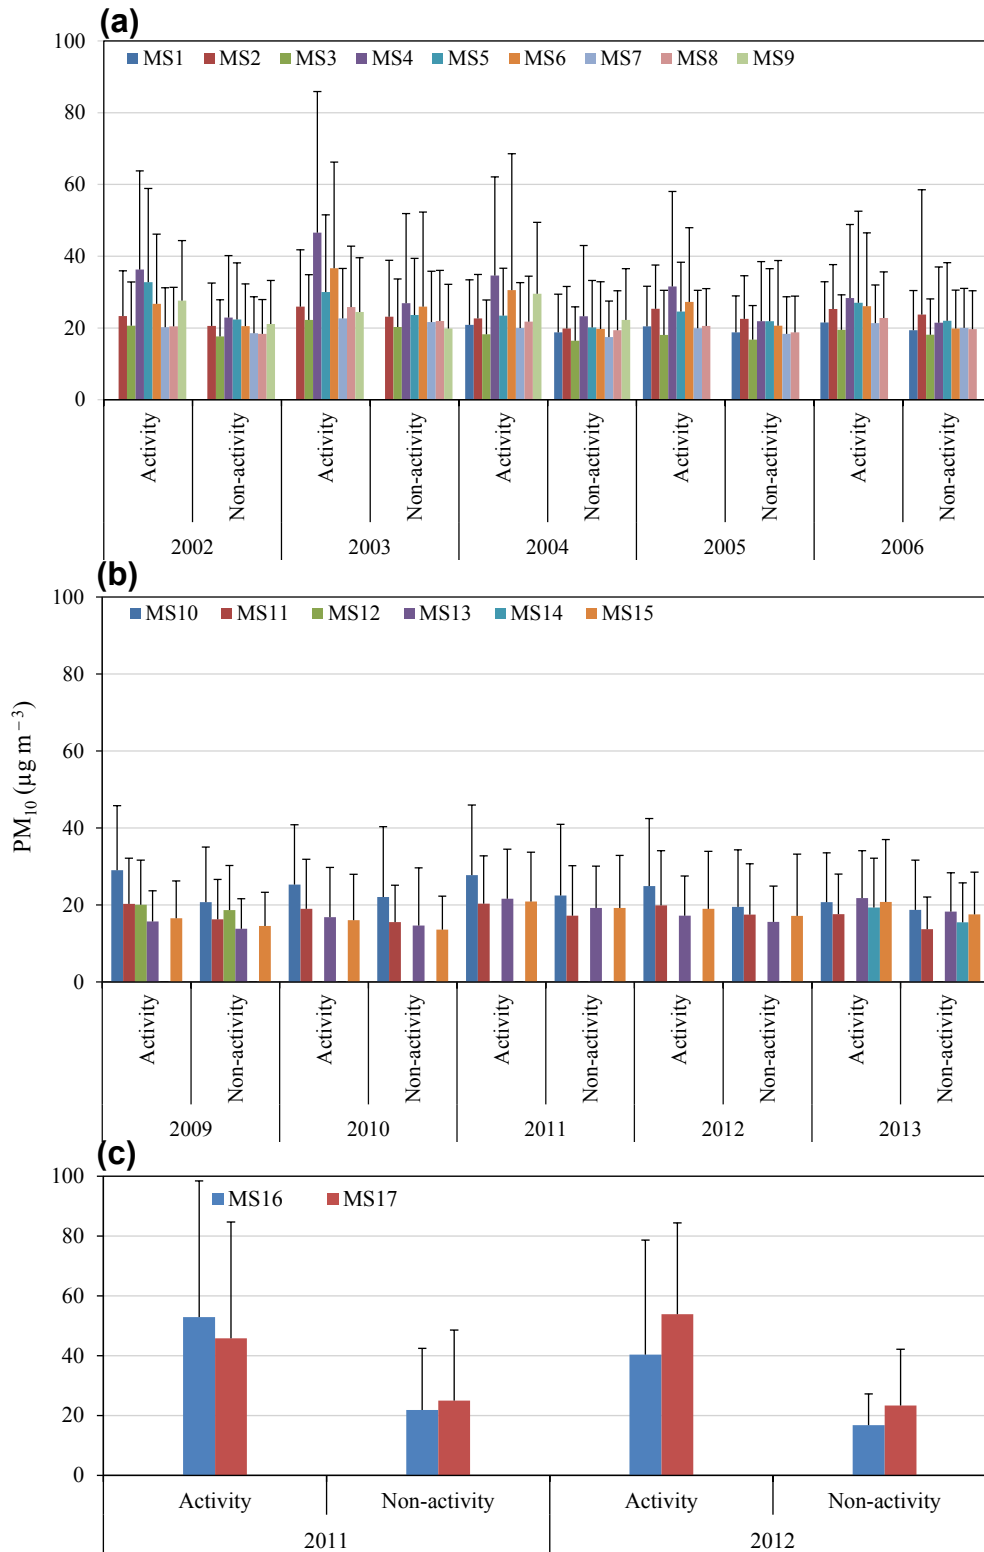

**Figure S1.** The average concentrations of PM<sub>10</sub> (17 monitoring stations) during the working and non-working periods at the (a) CS<sub>1</sub>, (b) CS<sub>2</sub>, and (c) CS<sub>3</sub>.

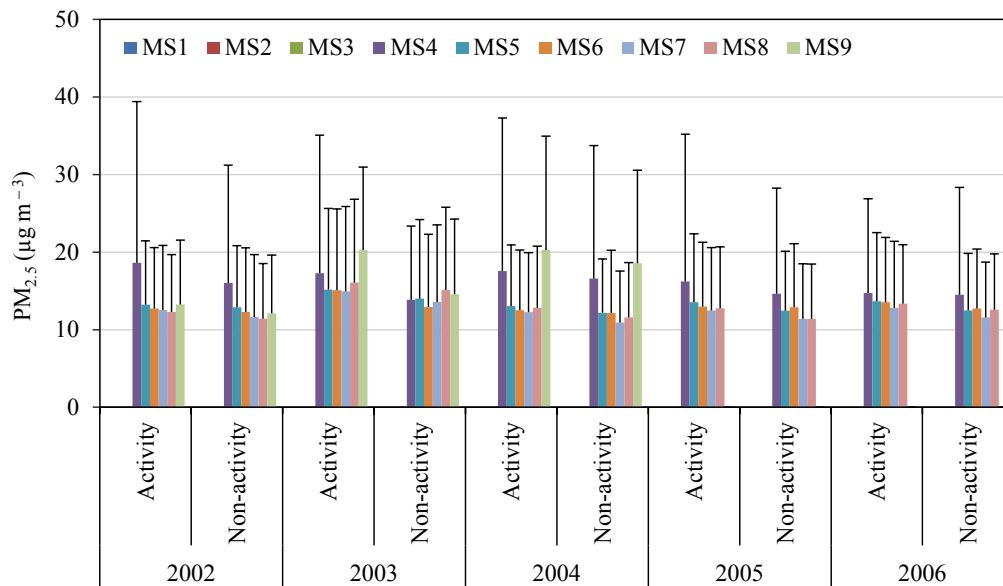

**Figure S2.** The average concentrations of PM<sub>2.5</sub> (monitoring stations) during the working and non-working periods at CS<sub>1</sub>.

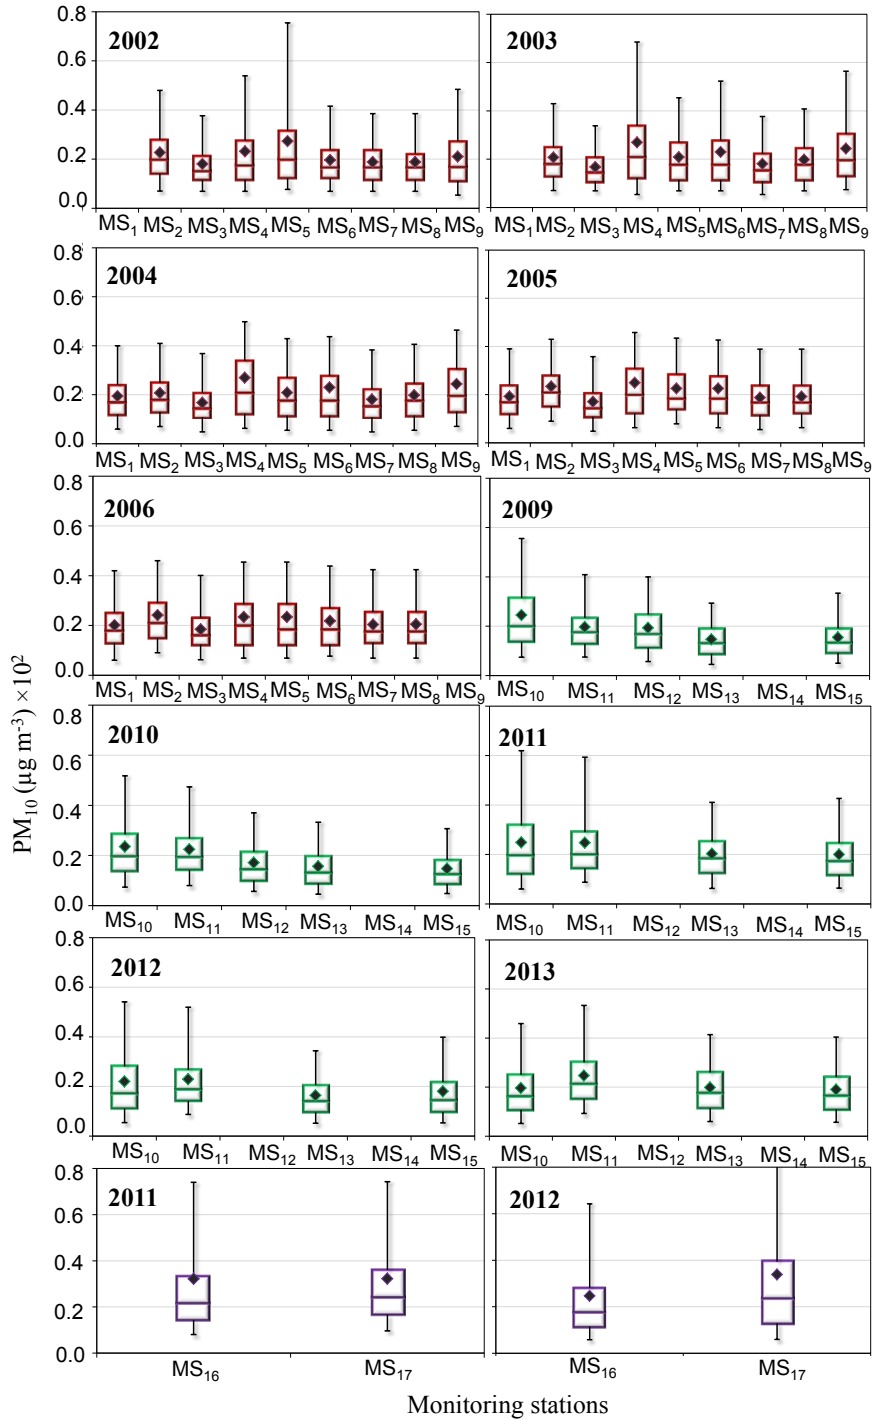

**Figure S3.** The Box and whiskers plots showing mean, upper, middle, and lower lines of “boxes” indicated seventy-fifth, fiftieth, and twenty-fifth percentiles of  $PM_{10}$  values during the activity and non-activity periods at the monitoring stations at  $CS_1$ (red colour),  $CS_2$ (green colour), and  $CS_3$ (violet colour).

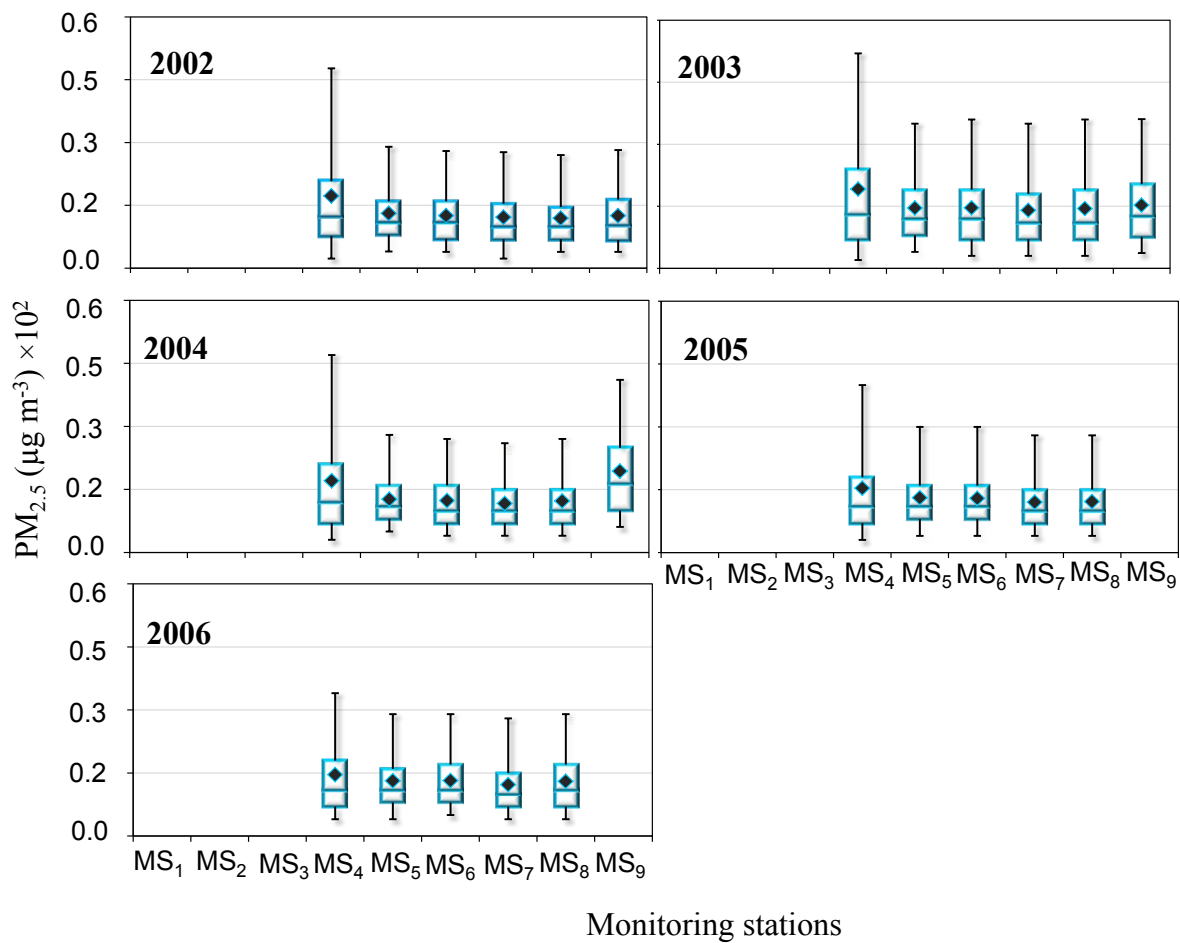

**Figure S4.** The Box and whiskers plots showing mean, upper, middle, and lower lines of “boxes” indicated seventy-fifth, fiftieth, and twenty-fifth percentiles of  $PM_{2.5}$  values during the activity and non-activity periods at the monitoring stations at CS<sub>1</sub>.

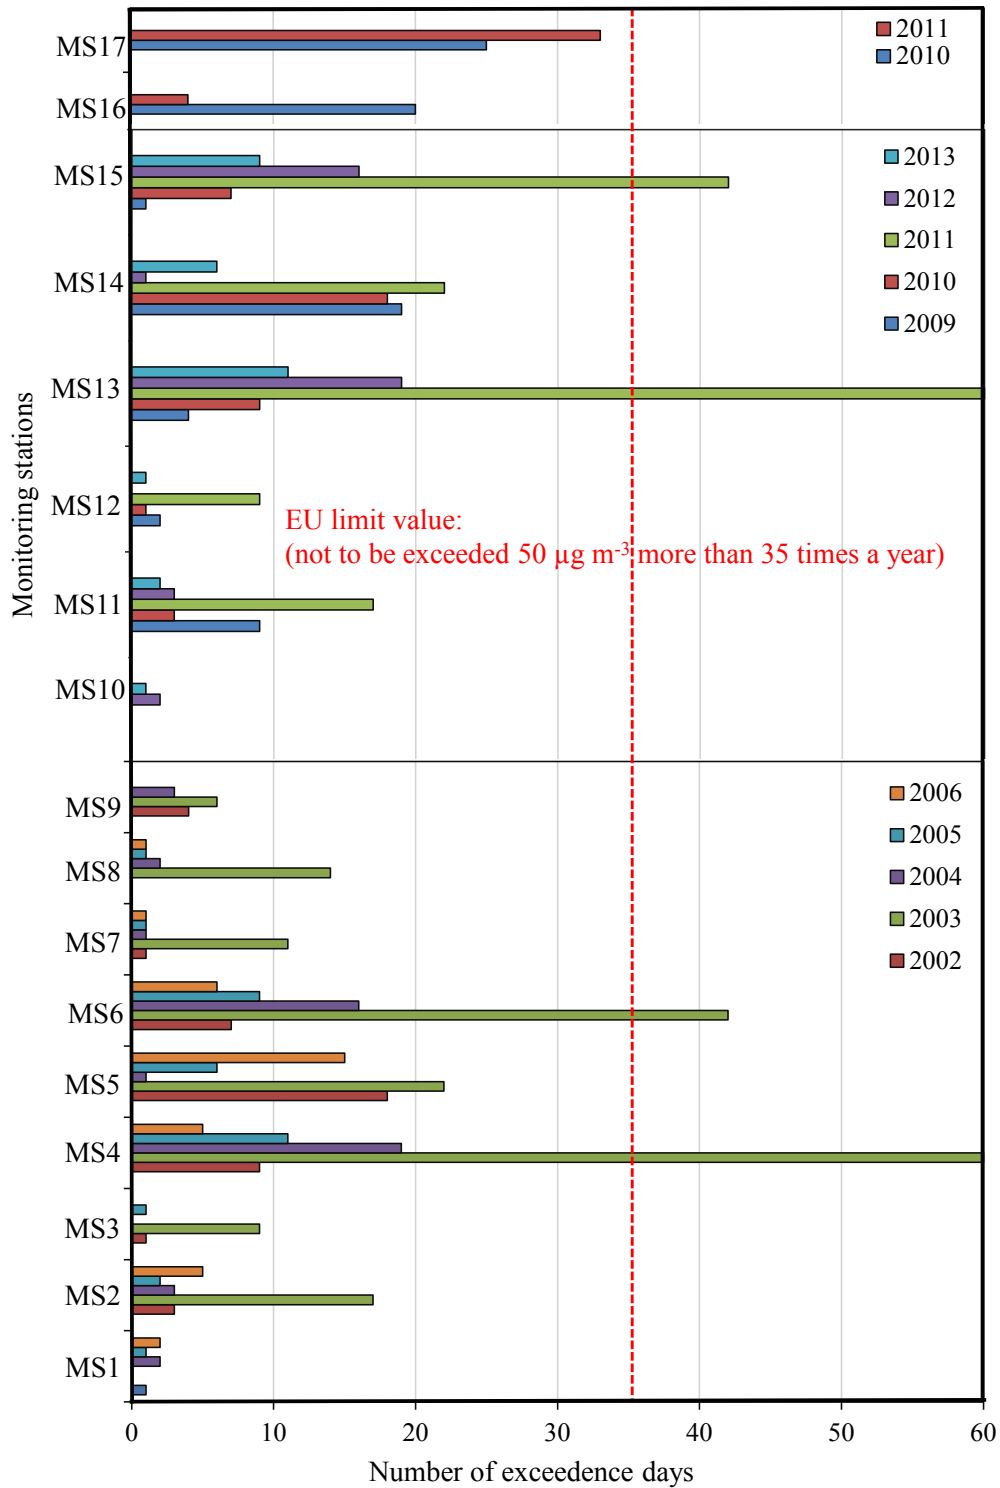

**Figure S5.** Total numbers of exceedences over the EU limit value at the individual monitoring stations.

**Table S1.** The concentrations of PM<sub>10</sub> during the working and non-working periods at the CS<sub>2</sub>; ± refers to standard deviation and “–” to the unavailability of data.

|         |                  | Monitoring stations |                  |                  |                  |                  |                  |
|---------|------------------|---------------------|------------------|------------------|------------------|------------------|------------------|
| Year    | PM <sub>10</sub> | MS <sub>10</sub>    | MS <sub>11</sub> | MS <sub>12</sub> | MS <sub>13</sub> | MS <sub>14</sub> | MS <sub>15</sub> |
| 2009    | Working          | 29.006±16.77        | 20.30±11.82      | 20.05±11.60      | 15.69±8.01       | –                | 16.57±9.67       |
|         | Non-working      | 20.72±14.30         | 16.26±10.35      | 18.64±11.58      | 13.81±7.79       | –                | 14.52±8.77       |
| 2010    | Working          | 25.31±15.51         | 18.97±12.89      | –                | 16.84±12.89      | –                | 16.05±11.90      |
|         | Non-working      | 22.06±18.27         | 15.57±9.57       | –                | 14.64±14.97      | –                | 13.57±8.71       |
| 2011    | Working          | 27.74±18.23         | 20.35±12.43      | –                | 21.59±12.89      | –                | 20.91±12.81      |
|         | Non-working      | 22.46±18.46         | 17.22±12.95      | –                | 19.22±10.88      | –                | 19.20±13.68      |
| 2012    | Working          | 24.92±17.53         | 19.88±14.22      | –                | 17.22±10.27      | –                | 18.98±14.93      |
|         | Non-working      | 19.48±14.82         | 17.48±13.19      | –                | 15.62±9.28       | –                | 17.16±16.05      |
| 2013    | Working          | 20.71±12.82         | 17.60±10.39      | –                | 21.75±12.36      | 19.36±12.76      | 20.77±16.22      |
|         | Non-working      | 18.72±12.90         | 13.68±8.40       | –                | 18.30±10.04      | 15.50±10.21      | 17.54±10.97      |
| Overall | Working          | 25.54±3.18          | 19.42±1.15       | 20.056±0.00      | 18.36±2.84       | 19.36±0.00       | 18.66±2.27       |
| Overall | Non-working      | 20.69±1.60          | 16.04±0.33       | 18.64±0.00       | 16.32±2.33       | 15.50±0.00       | 16.40±2.30       |

**Table S2.** The concentrations of PM<sub>10</sub> during the working and non-working periods at the CS<sub>3</sub>; ± refers to standard deviation.

|         |                  | Monitoring stations |                  |
|---------|------------------|---------------------|------------------|
| Year    | PM <sub>10</sub> | MS <sub>16</sub>    | MS <sub>17</sub> |
| 2011    | Working          | 29.006±16.77        | 20.30±11.82      |
|         | Non-working      | 20.72±14.30         | 16.26±10.35      |
| 2012    | Working          | 25.31±15.51         | 18.97±12.89      |
|         | Non-working      | 22.06±18.27         | 15.57±9.57       |
| Overall | Working          | 46.62±8.82          | 49.84±5.66       |
| Overall | Non-working      | 19.30±3.62          | 24.16±1.11       |



**Table S3.** The concentrations of PM<sub>10</sub> during the working and non-working periods at the CS<sub>1</sub>; ± refers to standard deviation and “–” to the unavailability of data.

|         |                  | Monitoring stations |                 |                 |                 |                 |                 |                 |                 |                 |
|---------|------------------|---------------------|-----------------|-----------------|-----------------|-----------------|-----------------|-----------------|-----------------|-----------------|
| Year    | PM <sub>10</sub> | MS <sub>1</sub>     | MS <sub>2</sub> | MS <sub>3</sub> | MS <sub>4</sub> | MS <sub>5</sub> | MS <sub>6</sub> | MS <sub>7</sub> | MS <sub>8</sub> | MS <sub>9</sub> |
| 2002    | Working          | –                   | 23.34±12.60     | 20.64±12.19     | 36.29±27.47     | 32.74±26.12     | 26.71±19.46     | 20.19±11.04     | 20.45±10.89     | 27.64±16.69     |
|         | Non-working      | –                   | 20.54±11.95     | 17.65±10.20     | 22.89±17.30     | 22.37±15.79     | 20.51±11.78     | 18.56±10.11     | 18.38±9.53      | 21.08±12.14     |
| 2003    | Working          | –                   | 25.98±15.82     | 22.23±12.60     | 46.56±39.31     | 30.04±21.49     | 36.67±29.53     | 22.67±13.91     | 25.81±16.99     | 24.46±15.09     |
|         | Non-working      | –                   | 23.16±15.68     | 20.28±13.37     | 26.90±24.96     | 23.61±15.80     | 25.95±26.33     | 21.65±14.15     | 21.94±14.09     | 19.83±12.33     |
| 2004    | Working          | 20.84±12.57         | 22.66±12.25     | 18.22±9.59      | 34.62±27.47     | 23.46±13.20     | 30.56±37.97     | 19.96±12.64     | 21.74±12.69     | 29.56±19.90     |
|         | Non-working      | 18.78±10.60         | 19.85±11.72     | 16.42±9.45      | 23.27±19.70     | 20.15±13.08     | 19.73±13.13     | 17.48±10.02     | 19.38±10.96     | 22.25±14.26     |
| 2005    | Working          | 20.42±11.17         | 25.34±12.22     | 18.07±12.42     | 31.54±26.51     | 24.58±13.74     | 27.28±20.65     | 19.94±10.55     | 20.54±10.41     | –               |
|         | Non-working      | 18.78±10.15         | 22.51±12.05     | 16.76±9.47      | 21.88±16.62     | 21.89±14.61     | 20.62±18.16     | 18.37±10.32     | 18.78±10.06     | –               |
| 2006    | Working          | 21.54±11.35         | 25.27±12.37     | 19.49±9.76      | 28.32±20.52     | 27.03±25.51     | 26.07±20.45     | 21.33±10.65     | 22.78±12.87     | –               |
|         | Non-working      | 19.37±11.06         | 23.76±34.76     | 18.15±9.95      | 21.44±15.53     | 21.99±16.22     | 19.85±10.67     | 20.01±11.02     | 19.65±10.68     | –               |
| Overall | Working          | 20.93±0.56          | 24.52±1.43      | 19.73±1.74      | 35.47±6.90      | 27.56±3.83      | 29.46±4.38      | 20.82±1.18      | 22.26±2.43      | 27.22±2.57      |
| Overall | Non-working      | 18.98±0.34          | 21.92±1.69      | 17.85±1.52      | 23.27±2.15      | 22.00±1.23      | 21.33±2.61      | 19.21±1.63      | 19.63±1.38      | 21.06±1.21      |

**Table S4.** The concentrations of PM<sub>2.5</sub> during the working and non-working periods at the CS<sub>1</sub>; ± refers to standard deviation and “–” to the unavailability of data.

|                 |                   | Monitoring stations |                 |                 |                 |                 |                 |                 |                 |                 |
|-----------------|-------------------|---------------------|-----------------|-----------------|-----------------|-----------------|-----------------|-----------------|-----------------|-----------------|
| Year            | PM <sub>2.5</sub> | MS <sub>1</sub>     | MS <sub>2</sub> | MS <sub>3</sub> | MS <sub>4</sub> | MS <sub>5</sub> | MS <sub>6</sub> | MS <sub>7</sub> | MS <sub>8</sub> | MS <sub>9</sub> |
| 2002            | Working           | –                   | –               | –               | 18.60±20.81     | 13.22±8.23      | 12.72±7.87      | 12.55±8.29      | 12.30±7.39      | 13.27±8.26      |
|                 | Non-working       | –                   | –               | –               | 16.04±15.15     | 12.89±7.95      | 12.30±8.24      | 11.62.30±8.06   | 11.42±7.08      | 12.09±7.53      |
| 2003            | Working           | –                   | –               | –               | 17.28±17.77     | 15.16±10.48     | 15.09±10.47     | 14.95±10.91     | 16.06±10.76     | 20.27±10.66     |
|                 | Non-working       | –                   | –               | –               | 13.84±9.50      | 14.00±10.19     | 12.90±9.38      | 13.57±9.94      | 15.12±10.66     | 14.56±9.71      |
| 2004            | Working           | –                   | –               | –               | 17.57±19.70     | 13.05±7.87      | 12.51±7.76      | 12.26±7.64      | 12.81±7.95      | 20.27±14.65     |
|                 | Non-working       | –                   | –               | –               | 16.59±17.13     | 12.16±6.95      | 12.14±8.09      | 10.93±6.63      | 11.58±7.07      | 18.55±11.92     |
| 2005            | Working           | –                   | –               | –               | 16.21±18.96     | 13.55±8.80      | 12.98±8.27      | 12.49±8.08      | 12.75±7.92      | –               |
|                 | Non-working       | –                   | –               | –               | 14.62±13.63     | 12.44±7.66      | 12.88±8.19      | 11.38±7.09      | 11.40±7.05      | –               |
| 2006            | Working           | –                   | –               | –               | 14.71±12.16     | 13.67±8.84      | 13.53±8.35      | 12.80±8.59      | 13.33±7.60      | –               |
|                 | Non-working       | –                   | –               | –               | 14.50±13.82     | 12.47±7.34      | 12.73±7.65      | 11.57±7.13      | 12.55±7.21      | –               |
| Overall average | Working           | –                   | –               | –               | 16.88±1.47      | 13.73±0.83      | 13.37±1.03      | 13.01±1.10      | 13.45±1.50      | 17.94±2.90      |
| Overall average | Non-working       | –                   | –               | –               | 15.12±1.14      | 12.79±0.72      | 12.59±0.347     | 11.81±1.01      | 12.41±1.58      | 15.06±3.26      |
